# Supplementary material
Source: ML conference proceedings conference paper supplement (https://proceedings.mlr.press/v139/kaba21a.html)
Supplement: Supplementary file [file kaba21a-supp.pdf]

# Supplementary Material for the ICML 2021 Publication: A Nullspace Property for Subspace-Preserving Recovery

## 1 Introduction

**A note on numbering.** When we refer to a theorem/proposition/equation/etc. in this Supplementary Material, if its number has a section number in it, then it refers to a theorem/proposition/equation/etc. in the Supplementary Material. Otherwise it is a result in the original paper.

## 2 Preliminaries and problem formulation

**Detailed notation and preliminaries.** The set of integers from 1 up to  $N$  is denoted as  $[N] := \{1, \dots, N\}$ . For any  $\mathbf{c} \in \mathbb{R}^N$ , the support of  $\mathbf{c}$  is denoted as  $\text{Supp}(\mathbf{c}) := \{k \in [N] : c_k \neq 0\}$ . The vector  $\mathbf{c}$  is called  $s$ -sparse if  $|\text{Supp}(\mathbf{c})| \leq s$ . For any index set  $S \subseteq [N]$ , the complement of  $S$  in  $[N]$  is denoted by  $S^c$ . For a nonempty set  $S \subseteq [N]$ , the vector  $\mathbf{c}_S \in \mathbb{R}^{|S|}$  denotes the part of  $\mathbf{c}$  that is supported on  $S$ . We use  $\text{Pr}_S \in \mathbb{R}^{N \times N}$  to denote the matrix that projects onto the coordinates in  $S$  and sets all other coordinates to zero. For a matrix  $\mathbf{X} \in \mathbb{R}^{D \times N}$  and an index set  $S \subseteq [N]$ , the matrix  $\mathbf{X}_S \in \mathbb{R}^{D \times |S|}$  denotes the submatrix of  $\mathbf{X}$  consisting of the columns of  $\mathbf{X}$  indexed by  $S$ . Therefore, for all  $\mathbf{c} \in \mathbb{R}^N$ , we have  $\mathbf{X} \text{Pr}_S \mathbf{c} = \mathbf{X}_S \mathbf{c}_S$ . If  $S = \{j\}$  for some  $j$ , we simply write  $\mathbf{x}_j$  instead of  $\mathbf{X}_S$ , to refer to the  $j^{\text{th}}$ -column of  $\mathbf{X}$ . We prioritize the subscript over superscript in the sense that  $\mathbf{X}_S^\top \equiv (\mathbf{X}_S)^\top$ , and *not*  $(\mathbf{X}^\top)_S$ . Finally,  $\text{Null}(\mathbf{X})$  denotes the nullspace of the matrix  $\mathbf{X}$  and  $\mathbf{X}^{-1}(\cdot)$  denotes the inverse image under  $\mathbf{X}$ .

The  $\ell_p$ -norm of a vector  $\mathbf{x} \in \mathbb{R}^D$  is defined as  $\|\mathbf{x}\|_p := (\sum_{k=1}^D |x_k|^p)^{\frac{1}{p}}$ , where  $|\cdot|$  denotes the absolute value. The unit  $\ell_p$ -sphere is denoted by  $\mathbb{S}_p^{D-1} := \{\mathbf{x} \in \mathbb{R}^D : \|\mathbf{x}\|_p = 1\}$  and the unit  $\ell_p$ -ball is denoted by  $\mathbb{B}_p^D := \{\mathbf{x} \in \mathbb{R}^D : \|\mathbf{x}\|_p \leq 1\}$ .

The convex hull is denoted by  $\text{conv}(\cdot)$ . We denote the convex hull of the union of the columns of  $\mathbf{X}$  and  $-\mathbf{X}$  by  $\mathcal{K}(\mathbf{X})$ . Sometimes we refer to it as the *symmetrized convex hull* of the columns of  $\mathbf{X}$ . For a nonempty convex set  $\mathcal{C} \subseteq \mathbb{R}^D$ , the set of extreme points of  $\mathcal{C}$  is denoted as  $\text{Ext}(\mathcal{C})$ . These are precisely the points that cannot be written as a nontrivial convex combination of two distinct points in  $\mathcal{C}$ . The *interior* of  $\mathcal{C}$  is given by  $\text{inte}(\mathcal{C}) := \{\mathbf{x} \in \mathcal{C} : \exists \varepsilon > 0 \text{ s.t. } \mathbf{x} + \varepsilon \mathbb{B}_1^D \subseteq \mathcal{C}\}$ . Note that according to this definition, the interior of  $\mathcal{C}$  can be empty, although  $\mathcal{C}$  is non-empty. The *affine hull* of  $\mathcal{C}$ , denoted by  $\text{aff}(\mathcal{C})$ , is the smallest affine set in  $\mathbb{R}^D$  that contains  $\mathcal{C}$ . The *relative interior* [1, p.44] of  $\mathcal{C}$  is defined as  $\text{rinte}(\mathcal{C}) := \{\mathbf{x} \in \text{aff}(\mathcal{C}) : \exists \varepsilon > 0, (\mathbf{x} + \varepsilon \mathbb{B}_2^D) \cap \text{aff}(\mathcal{C}) \subseteq \mathcal{C}\}$ . The *polar* [1, p.125] of  $\mathcal{C}$  is defined as

$$\mathcal{C}^\circ := \{\mathbf{q} \in \mathbb{R}^D : \mathbf{q}^\top \mathbf{x} \leq 1 \text{ for all } \mathbf{x} \in \mathcal{C}\}. \quad (2.1)$$

Note  $\mathcal{C}^\circ$  is always a closed, convex set [1, p.125]. For any  $\varepsilon > 0$ , we have  $(\varepsilon \mathcal{C})^\circ = \frac{1}{\varepsilon} \mathcal{C}^\circ$  [1, Cor. 16.1.2]. If  $\mathcal{C}$  is closed and contains the origin, then  $\mathcal{C}^\circ$  is compact if and only if  $0 \in \text{inte}(\text{conv}(\mathcal{C}))$  [1, Cor. 14.5.1]. If  $\mathcal{C}_1, \mathcal{C}_2 \subseteq \mathbb{R}^D$  are closed convex sets, then  $\mathcal{C}_1 \subseteq \mathcal{C}_2$  if and only if  $\mathcal{C}_2^\circ \subseteq \mathcal{C}_1^\circ$  [1, p.125]. We define the dual  $\|\cdot\|_*$  of a norm  $\|\cdot\|$  as  $\|z\|_* := \sup_{\|y\| \leq 1} z^\top y$ . Then, if  $\ell_q$  denotes the dual of  $\ell_p$ -norm, we have  $\frac{1}{p} + \frac{1}{q} = 1$  and  $\mathbb{B}_q^D = (\mathbb{B}_p^D)^\circ$ .

We define the *inner- $\ell_p$ -radius* of a nonempty compact convex set  $\mathcal{C} \subseteq \mathbb{R}^D$  containing the origin as the radius of the largest  $\ell_p$ -ball (confined to the linear span of  $\mathcal{C}$ ) one can inscribe inside  $\mathcal{C}$ , and denote it by  $\mathfrak{r}_p(\mathcal{C})$ . That is,  $\mathfrak{r}_p(\mathcal{C}) := \max\{\alpha \in \mathbb{R}_{>0} : \alpha(\mathbb{B}_p^D \cap \text{span}(\mathcal{C})) \subseteq \mathcal{C}\}$ , where  $\text{span}(\mathcal{C})$  denotes the subspace spanned by  $\mathcal{C}$ . Likewise, we define the *outer- $\ell_p$ -radius* of  $\mathcal{C}$  as the radius of the smallest  $\ell_p$ -ball that contains  $\mathcal{C}$ , and denote it by  $\mathfrak{R}_p(\mathcal{C})$ . That is,  $\mathfrak{R}_p(\mathcal{C}) := \min\{\beta \in \mathbb{R}_{>0} : \beta \mathbb{B}_p^D \supseteq \mathcal{C}\}$ .

### 3 A nullspace property for subspace-preserving recovery

#### Proof of Lemma 1

*Proof.* Since each column of  $\mathbf{X}_P$  can be written as a convex combination of the union of the columns of  $\mathbf{X}_{\tilde{P}}$  and  $-\mathbf{X}_{\tilde{P}}$ , we conclude that  $\mathbf{X}_P = \mathbf{X}_{\tilde{P}}Y_P$  for some  $Y_P \in \mathbb{R}^{|\tilde{P}| \times |P|}$  with columns in  $\mathbb{S}_1^{|\tilde{P}|-1}$ . Also  $\mathbf{X}_{\tilde{P}} = \tilde{\mathbf{X}}_{\tilde{P}}$  holds trivially.

$\Rightarrow$ : Suppose that  $\mathbf{X}$  satisfies SNSP. Let  $\tilde{\eta} \in \text{Null}(\tilde{\mathbf{X}}, \tilde{\mathcal{P}})$  and  $\tilde{P} \in \tilde{\mathcal{P}}$ . There exists a unique  $P \in \mathcal{P}$  such that  $\tilde{P} \subseteq P$ . We lift  $\tilde{\eta}$  to  $\eta \in \text{Null}(\mathbf{X}, \mathcal{P})$  by inserting zeros at the missing indices. Since  $\mathbf{X}$  satisfies SNSP, the problem  $\min_{\mathbf{c}: \mathbf{X}_P(\eta_P) = \mathbf{X}_P(\mathbf{c})} \|\mathbf{c}\|_1$  has a minimizer  $\hat{\mathbf{c}}$  which satisfies

$$\|\hat{\mathbf{c}}\|_1 < \|\eta_{P^c}\|_1 \quad (3.2)$$

Furthermore, we have

$$\tilde{\mathbf{X}}_{\tilde{P}}(Y_P \hat{\mathbf{c}}) = (\tilde{\mathbf{X}}_{\tilde{P}} Y_P) \hat{\mathbf{c}} = \mathbf{X}_P \hat{\mathbf{c}} = \mathbf{X}_P \eta_P = \tilde{\mathbf{X}}_{\tilde{P}} \tilde{\eta}_{\tilde{P}}, \quad (3.3)$$

and we conclude that

$$\begin{aligned} \min_{\mathbf{c}: \tilde{\mathbf{X}}_{\tilde{P}} \tilde{\eta}_{\tilde{P}} = \tilde{\mathbf{X}}_{\tilde{P}}(\mathbf{c})} \|\mathbf{c}\|_1 &\leq \|Y_P \hat{\mathbf{c}}\|_1 && \text{Since } Y_P \hat{\mathbf{c}} \text{ is feasible by (3.3).} \\ &\leq \|\hat{\mathbf{c}}\|_1 && \text{Since } Y_P \text{ has normalized columns.} \\ &< \|\eta_{P^c}\|_1 && \text{By (3.2)} \\ &= \|\tilde{\eta}_{\tilde{P}^c}\|_1, \end{aligned}$$

and so,  $\tilde{\mathbf{X}}$  satisfies SNSP.

$\Leftarrow$ : Conversely, suppose  $\tilde{\mathbf{X}}$  satisfies SNSP. Let  $\eta \in \text{Null}(\mathbf{X}, \mathcal{P})$ . Suppose that  $\mathbf{X}$  has  $r$  columns, and define  $\tilde{\eta} \in \mathbb{R}^r$  as the vector satisfying  $\tilde{\eta}_{\tilde{P}} := Y_P \eta_P$  for all  $P \in \mathcal{P}$ . Note that we have

$$\tilde{\mathbf{X}}_{\tilde{P}}(\tilde{\eta}_{\tilde{P}}) = (\tilde{\mathbf{X}}_{\tilde{P}} Y_P) \eta_P = \mathbf{X}_P \eta_P. \quad (3.4)$$

Hence,  $\tilde{\mathbf{X}} \tilde{\eta} = \sum_{\tilde{P} \in \tilde{\mathcal{P}}} \tilde{\mathbf{X}}_{\tilde{P}}(\tilde{\eta}_{\tilde{P}}) = \sum_{P \in \mathcal{P}} \mathbf{X}_P \eta_P = \mathbf{X} \eta = 0$ . So, we conclude that  $\tilde{\eta} \in \text{Null}(\tilde{\mathbf{X}})$ .

If  $\mathbf{X}_P \eta_P = 0$  for all  $P \in \mathcal{P}$ , we have  $\min_{\mathbf{c}: \mathbf{X}_P(\eta_P) = \mathbf{X}_P(\mathbf{c})} \|\mathbf{c}\|_1 = 0 < \|\eta_{P^c}\|_1$  for all  $P \in \mathcal{P}$ . Therefore, (4) is satisfied for  $\eta$  and for all  $P \in \mathcal{P}$  trivially. So, w.l.o.g. we can assume that there exists  $Q, T \in \mathcal{P}$  with  $Q \neq T$ , such that  $\mathbf{X}_Q \eta_Q \neq 0 \neq \mathbf{X}_T \eta_T$ . In turn, we have  $\tilde{\mathbf{X}}_{\tilde{Q}} \tilde{\eta}_{\tilde{Q}} \neq 0 \neq \tilde{\mathbf{X}}_{\tilde{T}} \tilde{\eta}_{\tilde{T}}$  by (3.4). Hence, w.l.o.g.  $\text{Supp}(\tilde{\eta})$  is not contained in  $\tilde{P}$  for any  $\tilde{P} \in \tilde{\mathcal{P}}$ , and we have  $\tilde{\eta} \in \text{Null}(\tilde{\mathbf{X}}, \tilde{\mathcal{P}})$ .

Now we let  $P \in \mathcal{P}$ , and argue as follows:

$$\begin{aligned} \min_{\mathbf{c}: \mathbf{X}_P(\eta_P) = \mathbf{X}_P(\mathbf{c})} \|\mathbf{c}\|_1 &= \min_{\mathbf{c}: (\tilde{\mathbf{X}}_{\tilde{P}} Y_P)(\eta_P) = \mathbf{X}_P(\mathbf{c})} \|\mathbf{c}\|_1 \\ &\leq \min_{\mathbf{z}: \tilde{\mathbf{X}}_{\tilde{P}}(\tilde{\eta}_{\tilde{P}}) = \tilde{\mathbf{X}}_{\tilde{P}}(\mathbf{z})} \|\mathbf{z}\|_1 && \text{By restricting the constraint set.} \\ &< \|\tilde{\eta}_{\tilde{P}^c}\|_1 && \text{Since } \tilde{\mathbf{X}} \text{ satisfies SNSP.} \\ &= \sum_{\tilde{Q} \neq \tilde{P}, \tilde{Q} \in \tilde{\mathcal{P}}} \|\tilde{\eta}_{\tilde{Q}}\|_1 \\ &= \sum_{Q \neq P, Q \in \mathcal{P}} \|Y_Q \eta_Q\|_1 \\ &\leq \sum_{Q \neq P, Q \in \mathcal{P}} \|\eta_Q\|_1 && \text{Since } Y_Q \text{ has normalized columns.} \\ &= \|\eta_{P^c}\|_1. \end{aligned}$$

Hence,  $\mathbf{X}$  satisfies SNSP. □

### 4 A geometrically interpretable characterization of SNSP

There are no extra proofs for this section, or any additional material of other kind.

## 5 Reduction of the verification of SNSP to a decision on finite sets

### Reformulation of SNSP

**Lemma 5.1.** *For any  $P \in \mathcal{P}$ , the function  $f_P : \mathbb{R}^N \rightarrow \mathbb{R}_{\geq 0}$  defined as*

$$f(\eta) = \|\eta_P\|_1 + \min_{\mathbf{z}: \mathbf{X}_P \mathbf{z} = \mathbf{X}_P \eta_P} \|\mathbf{z}\|_1 \quad (5.5)$$

*is convex and positively homogeneous of degree 1.*

*Proof.* We first aim to establish that  $f_P$  is a convex function. Let  $\lambda \in [0, 1]$  and  $w, y \in \mathbb{R}^N$ . Then,

$$\begin{aligned} f_P(\lambda w + (1 - \lambda)y) &= \|\lambda w_P + (1 - \lambda)y_P\|_1 + \min_{\mathbf{z}: \mathbf{X}_P(\lambda w_P + (1 - \lambda)y_P) = \mathbf{X}_P(\mathbf{z})} \|\mathbf{z}\|_1 \\ &\leq \|\lambda w_P + (1 - \lambda)y_P\|_1 + \|\lambda(w_P + \eta_w) + (1 - \lambda)(y_P + \eta_y)\|_1 \quad \text{for all } \eta_w, \eta_y \in \text{Null}(\mathbf{X}_P) \\ &\leq \lambda(\|w_P\|_1 + \|w_P + \eta_w\|_1) + (1 - \lambda)(\|y_P\|_1 + \|y_P + \eta_y\|_1) \quad \text{for all } \eta_w, \eta_y \in \text{Null}(\mathbf{X}_P). \end{aligned}$$

In particular,

$$\begin{aligned} f_P(\lambda w + (1 - \lambda)y) &\leq \lambda \left( \|w_P\|_1 + \min_{\mathbf{z}: \mathbf{X}_P(w_P) = \mathbf{X}_P(\mathbf{z})} \|\mathbf{z}\|_1 \right) + (1 - \lambda) \left( \|y_P\|_1 + \min_{\mathbf{z}: \mathbf{X}_P(y_P) = \mathbf{X}_P(\mathbf{z})} \|\mathbf{z}\|_1 \right) \\ &= \lambda f_P(w) + (1 - \lambda) f_P(y), \end{aligned}$$

which establishes that  $f_P$  is a convex function.

In order to show positive homogeneity, let  $\alpha \in \mathbb{R}_{>0}$ . Then, it follows that

$$\begin{aligned} f_P(\alpha w) &= \|\alpha w_P\|_1 + \min_{\mathbf{z}: \mathbf{X}_P(\alpha w_P) = \mathbf{X}_P(\mathbf{z})} \|\mathbf{z}\|_1 \\ &= \alpha \|w_P\|_1 + \min_{\mathbf{z}: \mathbf{X}_P(w_P) = \mathbf{X}_P(\frac{1}{\alpha} \mathbf{z})} \|\mathbf{z}\|_1 \\ &= \alpha \|w_P\|_1 + \min_{\mathbf{y}: \mathbf{X}_P(w_P) = \mathbf{X}_P(\mathbf{y})} \|\alpha \mathbf{y}\|_1 \\ &= \alpha \|w_P\|_1 + \alpha \min_{\mathbf{y}: \mathbf{X}_P(w_P) = \mathbf{X}_P(\mathbf{y})} \|\mathbf{y}\|_1 = \alpha f_P(w), \end{aligned}$$

which completes the proof.  $\square$

**Proposition 5.1.** *The matrix  $\mathbf{X}$  satisfies SNSP if and only if for all  $\eta \in \text{Null}(\mathbf{X}, \mathcal{P}) \cap \mathbb{B}_1^N$  and for all  $P \in \mathcal{P}$ , we have*

$$\|\eta_P\|_1 + \min_{\mathbf{z}: \mathbf{X}_P(\eta_P) = \mathbf{X}_P(\mathbf{z})} \|\mathbf{z}\|_1 < 1 \quad (5.6)$$

*Proof.* The matrix  $\mathbf{X}$  satisfies SNSP if and only if  $\eta \in \text{Null}(\mathbf{X}, \mathcal{P})$  and for all  $P \in \mathcal{P}$ , we have  $f_P(\eta) < \|\eta\|_1$ . That is, if and only if,  $f_P\left(\frac{\eta}{\|\eta\|_1}\right) < 1$ , since  $f_P$  is positively homogeneous by Lemma 5.1. Hence,  $\mathbf{X}$  satisfies SNSP if and only if for all  $\eta \in \text{Null}(\mathbf{X}, \mathcal{P}) \cap \mathbb{S}_1^{N-1}$  and for all  $P \in \mathcal{P}$ , we have  $f_P(\eta) < 1$ . This is true, if and only, for all  $\eta \in \text{Null}(\mathbf{X}, \mathcal{P}) \cap \mathbb{B}_1^N$  and for all  $P \in \mathcal{P}$  (5.6) holds, as claimed.  $\square$

### Proof of Thm. 3

*Proof.* We will use Prop. 5.1 to show the equivalence. For this purpose, what we need to show is the following: The inequality (5.6) holds for all  $P \in \mathcal{P}$  and for all  $\eta \in \text{Null}(\mathbf{X}, \mathcal{P}) \cap \mathbb{B}_1^N$ , if and only if, it holds for all  $P \in \mathcal{P}$  and for all  $\eta \in \text{Ext}(\text{Null}(\mathbf{X}) \cap \mathbb{B}_1^N, \mathcal{P})$ .

$\Rightarrow$ : Obvious, since  $\text{Ext}(\text{Null}(\mathbf{X}) \cap \mathbb{B}_1^N, \mathcal{P}) \subset \text{Null}(\mathbf{X}, \mathcal{P}) \cap \mathbb{B}_1^N$ .

$\Leftarrow$ : Let  $P \in \mathcal{P}$ , and  $\eta \in \text{Null}(\mathbf{X}, \mathcal{P}) \cap \mathbb{B}_1^N$ . Then, there exists  $r \geq 1$ ,  $\{w_l\}_{l=1}^r \in \text{Ext}(\text{Null}(\mathbf{X}) \cap \mathbb{B}_1^N)$  and  $\{\lambda_l\}_{l=1}^r \subset (0, 1]$  with  $\sum_{l=1}^r \lambda_l = 1$  such that  $\eta = \sum_{l=1}^r \lambda_l w_l$ .

Let  $f_P$  be the function in Lemma 5.1. Note that for all  $l \in \{1, \dots, r\}$ , if there exists  $Q_l \in \mathcal{P}$  such that  $\text{Supp}(w_l) \subseteq Q_l$ , then

$$f_P(w_l) = \begin{cases} 0 & \text{if } Q_l \neq P, \\ 1 & \text{if } Q_l = P. \end{cases}$$

If no such  $Q_l$  exists, then  $w_l \in \text{Ext}(\text{Null}(\mathbf{X}) \cap \mathbb{B}_1^N, \mathcal{P})$ , and  $f_P(w_l) < 1$ , by our hypothesis. So, we conclude that  $f_P(w_l) < 1$ , if  $\text{Supp}(w_l) \not\subseteq P$ .

Note that there must exist  $\bar{l} \in \{1, \dots, r\}$  such that  $\text{Supp}(w_{\bar{l}}) \not\subseteq P$  because, otherwise,  $\text{Supp}(\eta) \subseteq P$ , which would be a contradiction. Moreover,  $f_P(w_{\bar{l}}) < 1$ , which we can use to argue that

$$\begin{aligned} & \|\eta_P\|_1 + \min_{\mathbf{z}: \mathbf{X}_P(\eta_P) = \mathbf{X}_P(\mathbf{z})} \|\mathbf{z}\|_1 \\ &= f_P(\eta) = f_P\left(\sum_{l=1}^r \lambda_l w_l\right) \\ &\leq \sum_{l=1}^r \lambda_l f_P(w_l) && \text{Since } f_P \text{ is convex by Lemma 5.1} \\ &< \sum_{l=1}^r \lambda_l = 1 && \text{Since } f_P(w_{\bar{l}}) < 1 \text{ and } f_P(w_l) \leq 1, \end{aligned}$$

which completes the proof.  $\square$

## Auxiliary results for the dual of Basis Pursuit

When  $\Psi \in \mathbb{R}^{r \times s}$ , the dual of the  $\ell_1$ -minimization problem

$$\min_{\Psi \bar{y} = \Psi y} \|y\|_1 \tag{5.7}$$

is given by the following two equivalent forms

$$\max_{\Psi^\top v \in \mathbb{B}_\infty^s} \bar{y}^\top \Psi^\top v \quad \equiv \quad \max_{w \in \text{im}(\Psi^\top) \cap \mathbb{B}_\infty^s} \bar{y}^\top w. \tag{5.8}$$

Since there is no duality gap and we have  $\min_{\Psi \bar{y} = \Psi y} \|y\|_1 = \max_{w \in \text{im}(\Psi^\top) \cap \mathbb{B}_\infty^s} \bar{y}^\top w$ . We use the dual problem to derive sufficient conditions for SNSP, which are geometrically more interpretable. Therefore, the structure of  $\text{im}(\Psi^\top) \cap \mathbb{B}_\infty^s$  is of particular interest, and the next result helps us understand it better, when the columns of  $\Psi$  have unit  $\ell_p$ -norm.

**Lemma 5.2.** *Let  $\Psi \in \mathbb{R}^{r \times s}$  be a matrix with columns of unit  $\ell_p$ -norm with  $p \in [1, \infty]$ , and  $\ell_q$  be the dual of  $\ell_p$ . Then,*

$$\Psi \mathbb{B}_1^s \subseteq \text{im}(\Psi) \cap \mathbb{B}_p^r, \tag{5.9}$$

or alternatively,

$$\text{im}(\Psi^\top) \cap \mathbb{B}_\infty^s \supseteq \Psi^\top \mathbb{B}_q^r. \tag{5.10}$$

When  $p \in \{1, \infty\}$ , the equality holds in (5.9), if and only if, equality holds in (5.10).

*Proof.* Since the columns of  $\Psi$  have unit  $\ell_p$ -norm, we must have  $\Psi v \in \mathbb{B}_p^r$  for all  $v \in \mathbb{B}_1^s$ . That is, we have  $\Psi \mathbb{B}_1^s \subseteq \mathbb{B}_p^r$ , so that (5.9) follows trivially.

The inclusion (5.9) implies  $\mathbb{B}_1^s \subseteq \Psi^{-1} \mathbb{B}_p^r$ . Taking the polar of both sides, we obtain  $\mathbb{B}_\infty^s = (\mathbb{B}_1^s)^\circ \supseteq (\Psi^{-1} \mathbb{B}_p^r)^\circ = \Psi^\top \mathbb{B}_q^r$  by [1, Cor. 16.3.2]. Since  $\text{im}(\Psi^\top) \supseteq \Psi^\top \mathbb{B}_q^r$  holds trivially, we obtain (5.10).

Suppose that  $p \in \{1, \infty\}$  and equality holds in (5.9). Taking inverse image under  $\Psi$  on both sides of (5.9), we obtain  $\Psi^{-1} \Psi \mathbb{B}_1^s = \Psi^{-1} (\text{im}(\Psi) \cap \mathbb{B}_p^r)$ . The left-hand-side of this equation is  $\text{Null}(\Psi) + \mathbb{B}_1^s$ , whereas the right-hand-side is equal to  $\Psi^{-1} \mathbb{B}_p^r$ . That is, we have  $\text{Null}(\Psi) + \mathbb{B}_1^s = \Psi^{-1} \mathbb{B}_p^r$ . Now, taking polar of both

sides, we obtain  $\text{im}(\Psi^\top) \cap \mathbb{B}_\infty^s = (\text{Null}(\Psi) + \mathbb{B}_1^s)^\circ = (\Psi^{-1}\mathbb{B}_p^r)^\circ = \Psi^\top \mathbb{B}_q^r$ , by [1, Cor. 16.3.2 & Cor. 16.5.2]. Conversely, suppose that equality holds in (5.10). Then, by taking the polar of both sides of the equality, we obtain  $\text{Null}(\Psi) + \mathbb{B}_1^s = \Psi^{-1}\mathbb{B}_p^r$ , by [1, Cor. 9.1.1, Cor. 16.3.2 & Cor. 16.5.2]. Applying  $\Psi$  to both sides, we obtain  $\Psi\mathbb{B}_1^s = \text{im}(\Psi) \cap \mathbb{B}_p^r$ .  $\square$

Since the span of  $\Psi\mathbb{B}_1^s$  is  $\text{im}(\Psi)$ , the definition of inner- $\ell_p$ -radius implies that  $\tau_p(\Psi\mathbb{B}_1^s)$  is the largest number such that  $\frac{1}{\tau_p(\Psi\mathbb{B}_1^s)}\Psi\mathbb{B}_1^s \supseteq \text{im}(\Psi) \cap \mathbb{B}_p^r$ . When  $p \notin \{1, \infty\}$ , we always have  $\tau_p(\Psi\mathbb{B}_1^s) < 1$ , but when  $p \in \{1, \infty\}$ , the equality can be attained, so we give this case a special name.

**Definition 5.1.** *Let  $p \in \{1, \infty\}$  and  $\Psi \in \mathbb{R}^{r \times s}$  be a matrix with columns of unit  $\ell_p$ -norm. We say that  $\Psi$  is perfectly expressive, if  $\tau_p(\Psi\mathbb{B}_1^s) = 1$ .*

We also have the following lemma, which characterizes perfectly expressiveness.

**Lemma 5.3.** *Let  $\Psi \in \mathbb{R}^{r \times s}$  be a matrix with columns of unit  $\ell_p$ -norm with  $p \in \{1, \infty\}$ . Then,  $\Psi$  is perfectly expressive, if and only if, one of the following equivalent conditions hold:*

1.  $\Psi\mathbb{B}_1^s = \text{im}(\Psi) \cap \mathbb{B}_p^r$ .
2. For all  $v \in \text{Ext}(\text{im}(\Psi) \cap \mathbb{B}_p^r)$ ,  $v$  or  $-v$  is a column of  $\Psi$ .
3.  $\text{im}(\Psi^\top) \cap \mathbb{B}_\infty^s = \Psi^\top \mathbb{B}_q^r$ .

*Proof.*  $1 \Rightarrow 2$ : If  $\Psi\mathbb{B}_1^s = \text{im}(\Psi) \cap \mathbb{B}_p^r$ , then we necessarily have  $\text{Ext}(\Psi\mathbb{B}_1^s) = \text{Ext}(\text{im}(\Psi) \cap \mathbb{B}_p^r)$ . That is, any  $v \in \text{Ext}(\text{im}(\Psi) \cap \mathbb{B}_p^r)$  is an extreme point of  $\Psi\mathbb{B}_1^s$ . But each extreme point of  $\Psi\mathbb{B}_1^s$  is either a column of  $\Psi$  or a column of  $-\Psi$ , and we get the result.

$2 \Rightarrow 1$ : If for all  $v \in \text{Ext}(\text{im}(\Psi) \cap \mathbb{B}_p^r)$ ,  $v$  or  $-v$  is a column of  $\Psi$ , then  $\text{Ext}(\text{im}(\Psi) \cap \mathbb{B}_p^r) \subseteq \Psi\mathbb{B}_1^s$ . Taking convex hull, we obtain  $\text{im}(\Psi) \cap \mathbb{B}_p^r = \text{conv}(\text{Ext}(\text{im}(\Psi) \cap \mathbb{B}_p^r)) \subseteq \Psi\mathbb{B}_1^s$ . Since the converse inclusion always holds by Lemma 5.2, we obtain the equality.

$3 \iff 1$ : Follows from Lemma 5.2.  $\square$

We end this part with a final auxiliary result that will be useful in the proof of Prop. 1.

**Lemma 5.4.** *Let  $\Psi \in \mathbb{R}^{r \times s}$  be a matrix with columns of unit  $\ell_p$ -norm with  $p \in [1, \infty]$ , and  $\ell_q$  be the dual of  $\ell_p$ . Then,*

$$\frac{1}{\tau_p(\Psi\mathbb{B}_1^s)} = \min \{ \beta \in \mathbb{R}_{\geq 1} : \text{im}(\Psi^\top) \cap \mathbb{B}_\infty^s \subseteq \beta \Psi^\top \mathbb{B}_q^r \}. \quad (5.11)$$

*Proof.* We set  $\beta^* := \min \{ \beta \in \mathbb{R}_{\geq 1} : \text{im}(\Psi^\top) \cap \mathbb{B}_\infty^s \subseteq \beta \Psi^\top \mathbb{B}_q^r \}$ . Then

$$\begin{aligned} \text{im}(\Psi^\top) \cap \mathbb{B}_\infty^s \subseteq \beta^* \Psi^\top \mathbb{B}_q^r &\iff (\text{im}(\Psi^\top) \cap \mathbb{B}_\infty^s)^\circ \supseteq (\beta^* \Psi^\top \mathbb{B}_q^r)^\circ \\ &\iff \text{Null}(\Psi) + \mathbb{B}_1^s \supseteq \frac{1}{\beta^*} \Psi^{-1} \mathbb{B}_p^r \\ &\iff \text{Null}(\Psi) + \beta^* \mathbb{B}_1^s \supseteq \Psi^{-1} \mathbb{B}_p^r \\ &\implies \beta^* \Psi \mathbb{B}_1^s \supseteq \Psi \Psi^{-1} \mathbb{B}_p^r = \text{im}(\Psi) \cap \mathbb{B}_p^r. \end{aligned}$$

Hence, we must have  $\beta^* \geq \frac{1}{\tau_p(\Psi\mathbb{B}_1^s)}$ . Conversely, we have

$$\begin{aligned} \text{im}(\Psi) \cap \mathbb{B}_p^r \subseteq \frac{1}{\tau_p(\Psi\mathbb{B}_1^s)} \Psi \mathbb{B}_1^s &\iff (\text{im}(\Psi) \cap \mathbb{B}_p^r)^\circ \supseteq \left( \frac{1}{\tau_p(\Psi\mathbb{B}_1^s)} \Psi \mathbb{B}_1^s \right)^\circ \\ &\iff \text{Null}(\Psi^\top) + \mathbb{B}_q^r \supseteq \tau_p(\Psi\mathbb{B}_1^s) (\Psi^\top)^{-1} \mathbb{B}_\infty^s \\ &\iff \text{Null}(\Psi^\top) + \frac{1}{\tau_p(\Psi\mathbb{B}_1^s)} \mathbb{B}_q^r \supseteq (\Psi^\top)^{-1} \mathbb{B}_\infty^s \\ &\implies \frac{1}{\tau_p(\Psi\mathbb{B}_1^s)} \Psi^\top \mathbb{B}_q^r \supseteq \Psi^\top (\Psi^\top)^{-1} \mathbb{B}_\infty^s = \text{im}(\Psi^\top) \cap \mathbb{B}_\infty^s. \end{aligned}$$

So, we also have the reverse inequality,  $\beta^* \leq \frac{1}{\tau_p(\Psi\mathbb{B}_1^s)}$ . Hence,  $\beta^* = \frac{1}{\tau_p(\Psi\mathbb{B}_1^s)}$ .  $\square$

**Proof of Prop. 1.**

*Proof.* By Lemma 5.4, we have  $\text{im}(\Psi^\top) \cap \mathbb{B}_\infty^s \subseteq \frac{1}{\tau_p(\Psi\mathbb{B}_1^s)} \Psi^\top \mathbb{B}_q^r$ . Hence,

$$\begin{aligned}
\max_{w \in \text{im}(\Psi^\top) \cap \mathbb{B}_\infty^s} \bar{y}^\top w &\leq \max_{w \in \frac{1}{\tau_p(\Psi\mathbb{B}_1^s)} \Psi^\top \mathbb{B}_q^r} \bar{y}^\top w & (5.12) \\
&= \frac{1}{\tau_p(\Psi\mathbb{B}_1^s)} \max_{w \in \Psi^\top \mathbb{B}_q^r} \bar{y}^\top w \\
&= \frac{1}{\tau_p(\Psi\mathbb{B}_1^s)} \max_{e \in \mathbb{B}_q^r} \bar{y}^\top \Psi^\top e \\
&= \frac{\|\Psi \bar{y}\|_p}{\tau_p(\Psi\mathbb{B}_1^s)}.
\end{aligned}$$

If  $p \in \{1, \infty\}$  and  $\tau_p(\Psi\mathbb{B}_1^s) = 1$  (i.e.  $\Psi$  is perfectly expressive), then, by Lemma 5.3, equality holds in (5.12) with  $\tau_p(\Psi\mathbb{B}_1^s) = 1$ , and the result follows.  $\square$

**References**

- [1] Ralph Tyrrell Rockafellar. *Convex Analysis*. Princeton University Press, 1970.
